# Supplementary material
Source: PubMed Central journal article supplement (PMC7857981)
Supplement: mmc1.pdf [file mmc1.pdf]

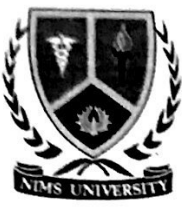

# NIMS UNIVERSITY RAJASTHAN, JAIPUR

Fully empowered & incorporated as a regular & full-fledged University under  
NIMS UNIVERSITY ACT, 2008 duly recognized by Government of India  
under the provisions of the Sections 2(f) and 22 of the UGC Act, 1956.

**FACULTIES:** • Medicine • Dentistry • Engineering • Advanced Engg. • Management • Law • Pharmacy • Nursing • Science & Technology  
• Physiotherapy • Allied Health Sciences • Fashion • Media • Mass Comm. • Hospitality • Aviation • Education • Library Sciences  
• Physical Education • Films & Television etc. • *multi-specialty 1130-bedded tertiary level Hospital on campus*

## INSTITUTIONAL ETHICS COMMITTEE NIMS UNIVERSITY RAJASTHAN, JAIPUR (INDIA)

Ref. No.: NIMSUR/IEC/2020/036

Date: 04<sup>th</sup> May, 2020

To:

Name: **Prof. (Dr.) Ganpat Devpura**

Department of **Medicine**

**Sub: IEC (Institutional Ethics Committee) Approval for research project**

Institutional Ethics Committee had reviewed and discussed the research project titled "**Impact of Indian traditional Ayurvedic treatment regime for nCoV-2 (COVID-19).**" After review and discussion, members decided to accord ethical clearance and allowed the study to be undertaken at National Institute of Medical Sciences and Research, Jaipur (NIMS University Rajasthan, Jaipur).

This approval is valid till the completion of the study, please inform us in case of any serious event observed during the conduct of the study.

From:

**Member Secretary**

**Institutional Ethics Committee,**

**NIMS University Rajasthan, Jaipur**

**FULL DETAILS (Read-only) -> [Click Here to Create PDF for Current Dataset of Trial](#)**

|                                                                                            |                                                                                              |                                                                                                                                                                                                                                   |
|--------------------------------------------------------------------------------------------|----------------------------------------------------------------------------------------------|-----------------------------------------------------------------------------------------------------------------------------------------------------------------------------------------------------------------------------------|
| <b>CTRI Number</b>                                                                         | <b>CTRI/2020/05/025273</b> [Registered on: 20/05/2020] <b>Trial Registered Prospectively</b> |                                                                                                                                                                                                                                   |
| <b>Last Modified On:</b>                                                                   | 20/05/2020                                                                                   |                                                                                                                                                                                                                                   |
| <b>Post Graduate Thesis</b>                                                                | No                                                                                           |                                                                                                                                                                                                                                   |
| <b>Type of Trial</b>                                                                       | Interventional                                                                               |                                                                                                                                                                                                                                   |
| <b>Type of Study</b>                                                                       | Ayurveda                                                                                     |                                                                                                                                                                                                                                   |
| <b>Study Design</b>                                                                        | Randomized, Parallel Group, Placebo Controlled Trial                                         |                                                                                                                                                                                                                                   |
| <b>Public Title of Study</b>                                                               | Impact of effect of Ayurvedic treatment on novel Corona virus disease                        |                                                                                                                                                                                                                                   |
| <b>Scientific Title of Study</b>                                                           | Impact of Indian traditional Ayurvedic treatment regime for nCoV-2 (COVID-19)                |                                                                                                                                                                                                                                   |
| <b>Trial Acronym</b>                                                                       |                                                                                              |                                                                                                                                                                                                                                   |
| <b>Secondary IDs if Any</b>                                                                | <b>Secondary ID</b>                                                                          | <b>Identifier</b>                                                                                                                                                                                                                 |
|                                                                                            | NIL                                                                                          | NIL                                                                                                                                                                                                                               |
| <b>Details of Principal Investigator or overall Trial Coordinator (multi-center study)</b> | <b>Name</b>                                                                                  | Dr Ganpat Devpura                                                                                                                                                                                                                 |
|                                                                                            | <b>Designation</b>                                                                           | Professor Medicine                                                                                                                                                                                                                |
|                                                                                            | <b>Affiliation</b>                                                                           | National Institute of Medical Sciences                                                                                                                                                                                            |
|                                                                                            | <b>Address</b>                                                                               | Professor Department of Medicine National Institute of Medical Sciences and Research, Jaipur India 303121<br>NH 11 C Jaipur Delhi Highway Nims University Campus Jaipur Rajasthan India<br>Jaipur<br>RAJASTHAN<br>303121<br>India |
|                                                                                            | <b>Phone</b>                                                                                 | 9829069669                                                                                                                                                                                                                        |
|                                                                                            | <b>Fax</b>                                                                                   |                                                                                                                                                                                                                                   |
|                                                                                            | <b>Email</b>                                                                                 | gdevpura@yahoo.co.in                                                                                                                                                                                                              |
| <b>Details of Contact Person Scientific Query</b>                                          | <b>Name</b>                                                                                  | Dr Abhishek Sharma                                                                                                                                                                                                                |
|                                                                                            | <b>Designation</b>                                                                           | Assistant Professor Medicine                                                                                                                                                                                                      |
|                                                                                            | <b>Affiliation</b>                                                                           | National Institute of Medical Sciences                                                                                                                                                                                            |
|                                                                                            | <b>Address</b>                                                                               | Professor Department of Medicine National Institute of Medical Sciences and Research, Jaipur India 303121<br>NH 11 C Jaipur Delhi Highway Nims University Campus Jaipur Rajasthan India<br>Jaipur<br>RAJASTHAN<br>302021<br>India |
|                                                                                            | <b>Phone</b>                                                                                 | 9828816135                                                                                                                                                                                                                        |
|                                                                                            | <b>Fax</b>                                                                                   |                                                                                                                                                                                                                                   |
|                                                                                            | <b>Email</b>                                                                                 | dr.abhisheksharma1987@gmail.com                                                                                                                                                                                                   |
| <b>Details of Contact Person Public Query</b>                                              | <b>Name</b>                                                                                  | Dr Abhishek Sharma                                                                                                                                                                                                                |
|                                                                                            | <b>Designation</b>                                                                           | Assistant Professor Medicine                                                                                                                                                                                                      |

|                                               |                                                                                                                                                                                                                                                                                                                                                                                                                                                                                                                                                                                                                                      |                                                                                                                                                                                                                   |                                           |                                               |                                                                                                                                                                                                                                   |                                       |                      |                     |                        |                |                                        |                                                                                                                                                                                                                   |                                           |
|-----------------------------------------------|--------------------------------------------------------------------------------------------------------------------------------------------------------------------------------------------------------------------------------------------------------------------------------------------------------------------------------------------------------------------------------------------------------------------------------------------------------------------------------------------------------------------------------------------------------------------------------------------------------------------------------------|-------------------------------------------------------------------------------------------------------------------------------------------------------------------------------------------------------------------|-------------------------------------------|-----------------------------------------------|-----------------------------------------------------------------------------------------------------------------------------------------------------------------------------------------------------------------------------------|---------------------------------------|----------------------|---------------------|------------------------|----------------|----------------------------------------|-------------------------------------------------------------------------------------------------------------------------------------------------------------------------------------------------------------------|-------------------------------------------|
|                                               | <table border="1"> <tr> <td><b>Affiliation</b></td> <td>National Institute of Medical Sciences</td> </tr> <tr> <td><b>Address</b></td> <td>Professor Department of Medicine National Institute of Medical Sciences and Research, Jaipur India 303121<br/>NH 11 C Jaipur Delhi Highway Nims University Campus Jaipur Rajasthan India<br/>Jaipur<br/>RAJASTHAN<br/>302021<br/>India</td> </tr> <tr> <td><b>Phone</b></td> <td>9828816135</td> </tr> <tr> <td><b>Fax</b></td> <td></td> </tr> <tr> <td><b>Email</b></td> <td>dr.abhisheksharma1987@gmail.com</td> </tr> </table>                                                        | <b>Affiliation</b>                                                                                                                                                                                                | National Institute of Medical Sciences    | <b>Address</b>                                | Professor Department of Medicine National Institute of Medical Sciences and Research, Jaipur India 303121<br>NH 11 C Jaipur Delhi Highway Nims University Campus Jaipur Rajasthan India<br>Jaipur<br>RAJASTHAN<br>302021<br>India | <b>Phone</b>                          | 9828816135           | <b>Fax</b>          |                        | <b>Email</b>   | dr.abhisheksharma1987@gmail.com        |                                                                                                                                                                                                                   |                                           |
| <b>Affiliation</b>                            | National Institute of Medical Sciences                                                                                                                                                                                                                                                                                                                                                                                                                                                                                                                                                                                               |                                                                                                                                                                                                                   |                                           |                                               |                                                                                                                                                                                                                                   |                                       |                      |                     |                        |                |                                        |                                                                                                                                                                                                                   |                                           |
| <b>Address</b>                                | Professor Department of Medicine National Institute of Medical Sciences and Research, Jaipur India 303121<br>NH 11 C Jaipur Delhi Highway Nims University Campus Jaipur Rajasthan India<br>Jaipur<br>RAJASTHAN<br>302021<br>India                                                                                                                                                                                                                                                                                                                                                                                                    |                                                                                                                                                                                                                   |                                           |                                               |                                                                                                                                                                                                                                   |                                       |                      |                     |                        |                |                                        |                                                                                                                                                                                                                   |                                           |
| <b>Phone</b>                                  | 9828816135                                                                                                                                                                                                                                                                                                                                                                                                                                                                                                                                                                                                                           |                                                                                                                                                                                                                   |                                           |                                               |                                                                                                                                                                                                                                   |                                       |                      |                     |                        |                |                                        |                                                                                                                                                                                                                   |                                           |
| <b>Fax</b>                                    |                                                                                                                                                                                                                                                                                                                                                                                                                                                                                                                                                                                                                                      |                                                                                                                                                                                                                   |                                           |                                               |                                                                                                                                                                                                                                   |                                       |                      |                     |                        |                |                                        |                                                                                                                                                                                                                   |                                           |
| <b>Email</b>                                  | dr.abhisheksharma1987@gmail.com                                                                                                                                                                                                                                                                                                                                                                                                                                                                                                                                                                                                      |                                                                                                                                                                                                                   |                                           |                                               |                                                                                                                                                                                                                                   |                                       |                      |                     |                        |                |                                        |                                                                                                                                                                                                                   |                                           |
| <b>Source of Monetary or Material Support</b> | Patanjali Research Institute Governed by Patanjali Reserach Foundation Trust, Haridwar, Uttrakhand                                                                                                                                                                                                                                                                                                                                                                                                                                                                                                                                   |                                                                                                                                                                                                                   |                                           |                                               |                                                                                                                                                                                                                                   |                                       |                      |                     |                        |                |                                        |                                                                                                                                                                                                                   |                                           |
| <b>Primary Sponsor</b>                        | <table border="1"> <tr> <td><b>Name</b></td> <td>Patanjali Research Institute</td> </tr> <tr> <td><b>Address</b></td> <td>Patanjali Research Institute Patanjali Yogpeeth Trust Haridwar, Uttarakhand</td> </tr> <tr> <td><b>Type of Sponsor</b></td> <td>Research institution</td> </tr> </table>                                                                                                                                                                                                                                                                                                                                   | <b>Name</b>                                                                                                                                                                                                       | Patanjali Research Institute              | <b>Address</b>                                | Patanjali Research Institute Patanjali Yogpeeth Trust Haridwar, Uttarakhand                                                                                                                                                       | <b>Type of Sponsor</b>                | Research institution |                     |                        |                |                                        |                                                                                                                                                                                                                   |                                           |
| <b>Name</b>                                   | Patanjali Research Institute                                                                                                                                                                                                                                                                                                                                                                                                                                                                                                                                                                                                         |                                                                                                                                                                                                                   |                                           |                                               |                                                                                                                                                                                                                                   |                                       |                      |                     |                        |                |                                        |                                                                                                                                                                                                                   |                                           |
| <b>Address</b>                                | Patanjali Research Institute Patanjali Yogpeeth Trust Haridwar, Uttarakhand                                                                                                                                                                                                                                                                                                                                                                                                                                                                                                                                                          |                                                                                                                                                                                                                   |                                           |                                               |                                                                                                                                                                                                                                   |                                       |                      |                     |                        |                |                                        |                                                                                                                                                                                                                   |                                           |
| <b>Type of Sponsor</b>                        | Research institution                                                                                                                                                                                                                                                                                                                                                                                                                                                                                                                                                                                                                 |                                                                                                                                                                                                                   |                                           |                                               |                                                                                                                                                                                                                                   |                                       |                      |                     |                        |                |                                        |                                                                                                                                                                                                                   |                                           |
| <b>Details of Secondary Sponsor</b>           | <table border="1"> <tr> <td><b>Name</b></td> <td><b>Address</b></td> </tr> <tr> <td>National Institute of Medical Sciences Jaipur</td> <td>NH 11 C Jaipur Delhi Highway, Nims University Campus, Jaipur, Rajasthan, India</td> </tr> </table>                                                                                                                                                                                                                                                                                                                                                                                        | <b>Name</b>                                                                                                                                                                                                       | <b>Address</b>                            | National Institute of Medical Sciences Jaipur | NH 11 C Jaipur Delhi Highway, Nims University Campus, Jaipur, Rajasthan, India                                                                                                                                                    |                                       |                      |                     |                        |                |                                        |                                                                                                                                                                                                                   |                                           |
| <b>Name</b>                                   | <b>Address</b>                                                                                                                                                                                                                                                                                                                                                                                                                                                                                                                                                                                                                       |                                                                                                                                                                                                                   |                                           |                                               |                                                                                                                                                                                                                                   |                                       |                      |                     |                        |                |                                        |                                                                                                                                                                                                                   |                                           |
| National Institute of Medical Sciences Jaipur | NH 11 C Jaipur Delhi Highway, Nims University Campus, Jaipur, Rajasthan, India                                                                                                                                                                                                                                                                                                                                                                                                                                                                                                                                                       |                                                                                                                                                                                                                   |                                           |                                               |                                                                                                                                                                                                                                   |                                       |                      |                     |                        |                |                                        |                                                                                                                                                                                                                   |                                           |
| <b>Countries of Recruitment</b>               | India                                                                                                                                                                                                                                                                                                                                                                                                                                                                                                                                                                                                                                |                                                                                                                                                                                                                   |                                           |                                               |                                                                                                                                                                                                                                   |                                       |                      |                     |                        |                |                                        |                                                                                                                                                                                                                   |                                           |
| <b>Sites of Study</b>                         | <table border="1"> <tr> <td colspan="4" style="text-align: center;">No of Sites = 1</td> </tr> <tr> <td><b>Name of Principal Investigator</b></td> <td><b>Name of Site</b></td> <td><b>Site Address</b></td> <td><b>Phone/Fax/Email</b></td> </tr> <tr> <td>Deepak Nathiya</td> <td>National Institute of Medical Sciences</td> <td>Department of Medicine, National Institute of Medical Sciences &amp; Research, Nims University Rajasthan, Jaipur NH 11 C Jaipur Delhi Highway Nims University Campus, Jaipur, Rajasthan, India<br/>Jaipur<br/>RAJASTHAN</td> <td>9929600137<br/><br/>deepaknathiya@gmail.com</td> </tr> </table> | No of Sites = 1                                                                                                                                                                                                   |                                           |                                               |                                                                                                                                                                                                                                   | <b>Name of Principal Investigator</b> | <b>Name of Site</b>  | <b>Site Address</b> | <b>Phone/Fax/Email</b> | Deepak Nathiya | National Institute of Medical Sciences | Department of Medicine, National Institute of Medical Sciences & Research, Nims University Rajasthan, Jaipur NH 11 C Jaipur Delhi Highway Nims University Campus, Jaipur, Rajasthan, India<br>Jaipur<br>RAJASTHAN | 9929600137<br><br>deepaknathiya@gmail.com |
| No of Sites = 1                               |                                                                                                                                                                                                                                                                                                                                                                                                                                                                                                                                                                                                                                      |                                                                                                                                                                                                                   |                                           |                                               |                                                                                                                                                                                                                                   |                                       |                      |                     |                        |                |                                        |                                                                                                                                                                                                                   |                                           |
| <b>Name of Principal Investigator</b>         | <b>Name of Site</b>                                                                                                                                                                                                                                                                                                                                                                                                                                                                                                                                                                                                                  | <b>Site Address</b>                                                                                                                                                                                               | <b>Phone/Fax/Email</b>                    |                                               |                                                                                                                                                                                                                                   |                                       |                      |                     |                        |                |                                        |                                                                                                                                                                                                                   |                                           |
| Deepak Nathiya                                | National Institute of Medical Sciences                                                                                                                                                                                                                                                                                                                                                                                                                                                                                                                                                                                               | Department of Medicine, National Institute of Medical Sciences & Research, Nims University Rajasthan, Jaipur NH 11 C Jaipur Delhi Highway Nims University Campus, Jaipur, Rajasthan, India<br>Jaipur<br>RAJASTHAN | 9929600137<br><br>deepaknathiya@gmail.com |                                               |                                                                                                                                                                                                                                   |                                       |                      |                     |                        |                |                                        |                                                                                                                                                                                                                   |                                           |
| <b>Details of Ethics Committee</b>            | <table border="1"> <tr> <td colspan="2" style="text-align: center;">No of Ethics Committees= 1</td> </tr> <tr> <td><b>Name of Committee</b></td> <td><b>Approval Status</b></td> </tr> <tr> <td>Institutional Ethics Committee</td> <td>Approved</td> </tr> </table>                                                                                                                                                                                                                                                                                                                                                                 | No of Ethics Committees= 1                                                                                                                                                                                        |                                           | <b>Name of Committee</b>                      | <b>Approval Status</b>                                                                                                                                                                                                            | Institutional Ethics Committee        | Approved             |                     |                        |                |                                        |                                                                                                                                                                                                                   |                                           |
| No of Ethics Committees= 1                    |                                                                                                                                                                                                                                                                                                                                                                                                                                                                                                                                                                                                                                      |                                                                                                                                                                                                                   |                                           |                                               |                                                                                                                                                                                                                                   |                                       |                      |                     |                        |                |                                        |                                                                                                                                                                                                                   |                                           |
| <b>Name of Committee</b>                      | <b>Approval Status</b>                                                                                                                                                                                                                                                                                                                                                                                                                                                                                                                                                                                                               |                                                                                                                                                                                                                   |                                           |                                               |                                                                                                                                                                                                                                   |                                       |                      |                     |                        |                |                                        |                                                                                                                                                                                                                   |                                           |
| Institutional Ethics Committee                | Approved                                                                                                                                                                                                                                                                                                                                                                                                                                                                                                                                                                                                                             |                                                                                                                                                                                                                   |                                           |                                               |                                                                                                                                                                                                                                   |                                       |                      |                     |                        |                |                                        |                                                                                                                                                                                                                   |                                           |
| <b>Regulatory Clearance Status from DCGI</b>  | <table border="1"> <tr> <td><b>Status</b></td> </tr> <tr> <td>Not Applicable</td> </tr> </table>                                                                                                                                                                                                                                                                                                                                                                                                                                                                                                                                     | <b>Status</b>                                                                                                                                                                                                     | Not Applicable                            |                                               |                                                                                                                                                                                                                                   |                                       |                      |                     |                        |                |                                        |                                                                                                                                                                                                                   |                                           |
| <b>Status</b>                                 |                                                                                                                                                                                                                                                                                                                                                                                                                                                                                                                                                                                                                                      |                                                                                                                                                                                                                   |                                           |                                               |                                                                                                                                                                                                                                   |                                       |                      |                     |                        |                |                                        |                                                                                                                                                                                                                   |                                           |
| Not Applicable                                |                                                                                                                                                                                                                                                                                                                                                                                                                                                                                                                                                                                                                                      |                                                                                                                                                                                                                   |                                           |                                               |                                                                                                                                                                                                                                   |                                       |                      |                     |                        |                |                                        |                                                                                                                                                                                                                   |                                           |

|                                             |                                                                    |                                                                                                                                                                                                                                                                   |                                                                                                                                                                                                                                                                                                      |
|---------------------------------------------|--------------------------------------------------------------------|-------------------------------------------------------------------------------------------------------------------------------------------------------------------------------------------------------------------------------------------------------------------|------------------------------------------------------------------------------------------------------------------------------------------------------------------------------------------------------------------------------------------------------------------------------------------------------|
| <b>Health Condition / Problems Studied</b>  | <b>Health Type</b>                                                 | <b>Condition</b>                                                                                                                                                                                                                                                  |                                                                                                                                                                                                                                                                                                      |
|                                             | Patients                                                           | J969  Respiratory failure, unspecified,                                                                                                                                                                                                                           |                                                                                                                                                                                                                                                                                                      |
| <b>Intervention / Comparator Agent</b>      | <b>Type</b>                                                        | <b>Name</b>                                                                                                                                                                                                                                                       | <b>Details</b>                                                                                                                                                                                                                                                                                       |
|                                             | Intervention                                                       | Ayurvedic Therapy                                                                                                                                                                                                                                                 | Tablet Pure Ashwagandha 500mg BD, Oral, After Breakfast / Dinner Tablet Pure Giloy Extract 1000 mg BD, Oral, after Breakfast / Dinner Tablet Pure Tulsi Extract 500 mg BD, Oral, after Breakfast/Dinner Anu Taila 4 drops BD, Nasal Drop Powder Swasari Ras 2 gm BD, Oral, Before Breakfast / Dinner |
|                                             | Comparator Agent                                                   | Placebo Therapy                                                                                                                                                                                                                                                   | Placebo of same dosage form by Oral / Nasal route                                                                                                                                                                                                                                                    |
| <b>Inclusion Criteria</b>                   | <b>Age From</b>                                                    | 15.00 Year(s)                                                                                                                                                                                                                                                     |                                                                                                                                                                                                                                                                                                      |
|                                             | <b>Age To</b>                                                      | 80.00 Year(s)                                                                                                                                                                                                                                                     |                                                                                                                                                                                                                                                                                                      |
|                                             | <b>Gender</b>                                                      | Both                                                                                                                                                                                                                                                              |                                                                                                                                                                                                                                                                                                      |
|                                             | <b>Details</b>                                                     | Asymptomatic patients<br>Mildly symptomatic patients<br>Moderately symptomatic patients<br>Age 15-80 years of age<br>Patients able to give Informed consent and follow instructions<br>Agree to follow at 14 days and 30 days after testing positive for COVID-19 |                                                                                                                                                                                                                                                                                                      |
| <b>ExclusionCriteria</b>                    | <b>Details</b>                                                     | Severely symptomatic patients (SaO2 <90%)<br>Acute Respiratory Distress Syndrome (ARDS)<br>Life expectancy less than 1 year due to other co-morbid conditions                                                                                                     |                                                                                                                                                                                                                                                                                                      |
|                                             |                                                                    |                                                                                                                                                                                                                                                                   |                                                                                                                                                                                                                                                                                                      |
| <b>Method of Generating Random Sequence</b> | Computer generated randomization                                   |                                                                                                                                                                                                                                                                   |                                                                                                                                                                                                                                                                                                      |
| <b>Method of Concealment</b>                |                                                                    |                                                                                                                                                                                                                                                                   |                                                                                                                                                                                                                                                                                                      |
| <b>Blinding/Masking</b>                     |                                                                    |                                                                                                                                                                                                                                                                   |                                                                                                                                                                                                                                                                                                      |
| <b>Primary Outcome</b>                      | <b>Outcome</b>                                                     | <b>TimePoints</b>                                                                                                                                                                                                                                                 |                                                                                                                                                                                                                                                                                                      |
|                                             | Virological Clearance as measured by RT PCR of nasopharyngeal swab | Baseline, 3 Days, 7 Days, 14 Days                                                                                                                                                                                                                                 |                                                                                                                                                                                                                                                                                                      |
| <b>Secondary Outcome</b>                    | <b>Outcome</b>                                                     | <b>TimePoints</b>                                                                                                                                                                                                                                                 |                                                                                                                                                                                                                                                                                                      |
|                                             | Conversion from Symptomatic to Asymptomatic patient                | Baseline, 3 Days, 7 Days, 14 Days                                                                                                                                                                                                                                 |                                                                                                                                                                                                                                                                                                      |
|                                             | Reduction in C-reactive protein, ESR & IL-6                        |                                                                                                                                                                                                                                                                   |                                                                                                                                                                                                                                                                                                      |
|                                             | Improvement in heamatological parameters eg Total Leucocyte count  |                                                                                                                                                                                                                                                                   |                                                                                                                                                                                                                                                                                                      |
| Safety analysis                             |                                                                    |                                                                                                                                                                                                                                                                   |                                                                                                                                                                                                                                                                                                      |
| <b>Target Sample</b>                        | <b>Total Sample Size="120"</b>                                     |                                                                                                                                                                                                                                                                   |                                                                                                                                                                                                                                                                                                      |

|                                             |                                                                                                                                                                                                                                                                                                                                                                                                                                                                                                                                                                                                                                                                                                                                                                                                                                                                                                                                                                                                                                                                                                                                                                                                                                                                                   |
|---------------------------------------------|-----------------------------------------------------------------------------------------------------------------------------------------------------------------------------------------------------------------------------------------------------------------------------------------------------------------------------------------------------------------------------------------------------------------------------------------------------------------------------------------------------------------------------------------------------------------------------------------------------------------------------------------------------------------------------------------------------------------------------------------------------------------------------------------------------------------------------------------------------------------------------------------------------------------------------------------------------------------------------------------------------------------------------------------------------------------------------------------------------------------------------------------------------------------------------------------------------------------------------------------------------------------------------------|
| <b>Size</b>                                 | <b>Sample Size from India="120"</b><br><b>Final Enrollment numbers achieved (Total)=</b> "Applicable only for Completed/Terminated trials"<br><b>Final Enrollment numbers achieved (India)="</b> Applicable only for Completed/Terminated trials"                                                                                                                                                                                                                                                                                                                                                                                                                                                                                                                                                                                                                                                                                                                                                                                                                                                                                                                                                                                                                                 |
| <b>Phase of Trial</b>                       | N/A                                                                                                                                                                                                                                                                                                                                                                                                                                                                                                                                                                                                                                                                                                                                                                                                                                                                                                                                                                                                                                                                                                                                                                                                                                                                               |
| <b>Date of First Enrollment (India)</b>     | 29/05/2020                                                                                                                                                                                                                                                                                                                                                                                                                                                                                                                                                                                                                                                                                                                                                                                                                                                                                                                                                                                                                                                                                                                                                                                                                                                                        |
| <b>Date of Study Completion (India)</b>     | Applicable only for Completed/Terminated trials                                                                                                                                                                                                                                                                                                                                                                                                                                                                                                                                                                                                                                                                                                                                                                                                                                                                                                                                                                                                                                                                                                                                                                                                                                   |
| <b>Date of First Enrollment (Global)</b>    | Date Missing                                                                                                                                                                                                                                                                                                                                                                                                                                                                                                                                                                                                                                                                                                                                                                                                                                                                                                                                                                                                                                                                                                                                                                                                                                                                      |
| <b>Date of Study Completion (Global)</b>    | Applicable only for Completed/Terminated trials                                                                                                                                                                                                                                                                                                                                                                                                                                                                                                                                                                                                                                                                                                                                                                                                                                                                                                                                                                                                                                                                                                                                                                                                                                   |
| <b>Estimated Duration of Trial</b>          | <b>Years="0"</b><br><b>Months="2"</b><br><b>Days="0"</b>                                                                                                                                                                                                                                                                                                                                                                                                                                                                                                                                                                                                                                                                                                                                                                                                                                                                                                                                                                                                                                                                                                                                                                                                                          |
| <b>Recruitment Status of Trial (Global)</b> | Not Applicable                                                                                                                                                                                                                                                                                                                                                                                                                                                                                                                                                                                                                                                                                                                                                                                                                                                                                                                                                                                                                                                                                                                                                                                                                                                                    |
| <b>Recruitment Status of Trial (India)</b>  | Open to Recruitment                                                                                                                                                                                                                                                                                                                                                                                                                                                                                                                                                                                                                                                                                                                                                                                                                                                                                                                                                                                                                                                                                                                                                                                                                                                               |
| <b>Publication Details</b>                  | NIL                                                                                                                                                                                                                                                                                                                                                                                                                                                                                                                                                                                                                                                                                                                                                                                                                                                                                                                                                                                                                                                                                                                                                                                                                                                                               |
| <b>Brief Summary</b>                        | <p>COVID-19 infection is known to affect individuals with weak immunity more severely. Therefore, enhancing immunity is definitely one of the ways the doctors across the globe have been using for treating COVID-19 cases.</p> <p>The study is Interventional Randomized parallel group placebo controlled, Single Centric trial in which Impact of Indian traditional Ayurvedic treatment regime for nCoV-2 (COVID-19) will be accessed.</p> <p>To combat COVID-19 virus with Ayurveda, we have screened close to 1000 phytochemicals from more than 100 medicinal plants, in-silico. We looked for their binding affinities to COVID-19 essential proteins and host protein interactions. We have discovered that natural phytochemicals in Ashwagandha, Giloy and Tulsi indeed have potentials to combat COVID-19 and its pathogenicity.</p> <p><b>The patients who will be included in the study's active control group will receive -</b></p> <p>Tablet Swasari Ras : (500 mg)</p> <p>Tablet Pure Ashwagandha Extract : (500 mg)</p> <p>Tablet Pure Giloy Extract : (500 mg)</p> <p>Tablet Pure Tulsi Extract : (500 mg)</p> <p>Anu Taila (Nasal drop)</p> <p>The above mentioned ayurvedic medicines will be used at following dosage :</p> <p><b>In the morning:</b></p> |

At-least 60 mins before break-fast : 4 drops of Anu Taila (Nasal drop), in each nostril.

At-least 30 mins before break-fast : Swasari Ras 2 gm (with luke-warm water)

At-least 30 mins after break-fast : 2 Tablets Pure Giloy Extract  
1 Tablet Pure Ashwagandha  
1 Tablet Pure Tulsi Extract (with luke-warm water)

**In the evening:**

At-least 30 mins before dinner : Swasari Ras 2 gm (with luke-warm water)

At-least 30 mins after dinner : 2 Tablets Pure Giloy Extract  
: 1 Tablet Pure Ashwagandha  
1 Tablet Pure Tulsi Extract (with luke-warm water)

The above mentioned active control group will be compared with Placebo group receiving placebo of same dosage form. Symptomatic treatment will follow in both group along with treatment.

The primary outcome of the study will be assessed by measuring virological clearance as measured by RT PCR for nasopharageal swab at baseline, 3<sup>rd</sup>day, 7<sup>th</sup>days and 14<sup>th</sup> day.

The secondary outcomes will be assessed by measuring conversion from symptomatic to asymptomatic patient, reduction in CRP protein, ESR & IL-6. Further improvement in hematological parameter, Total leucocyte count and lymphocyte count. Safety analysis will also be done.

[Close](#)
